# Supplementary material
Source: ML conference proceedings conference paper supplement (https://openreview.net/forum?id=UfNNqRSkAn)

# Per-SOC citation accuracy (§4.8) — 95% Wilson CIs

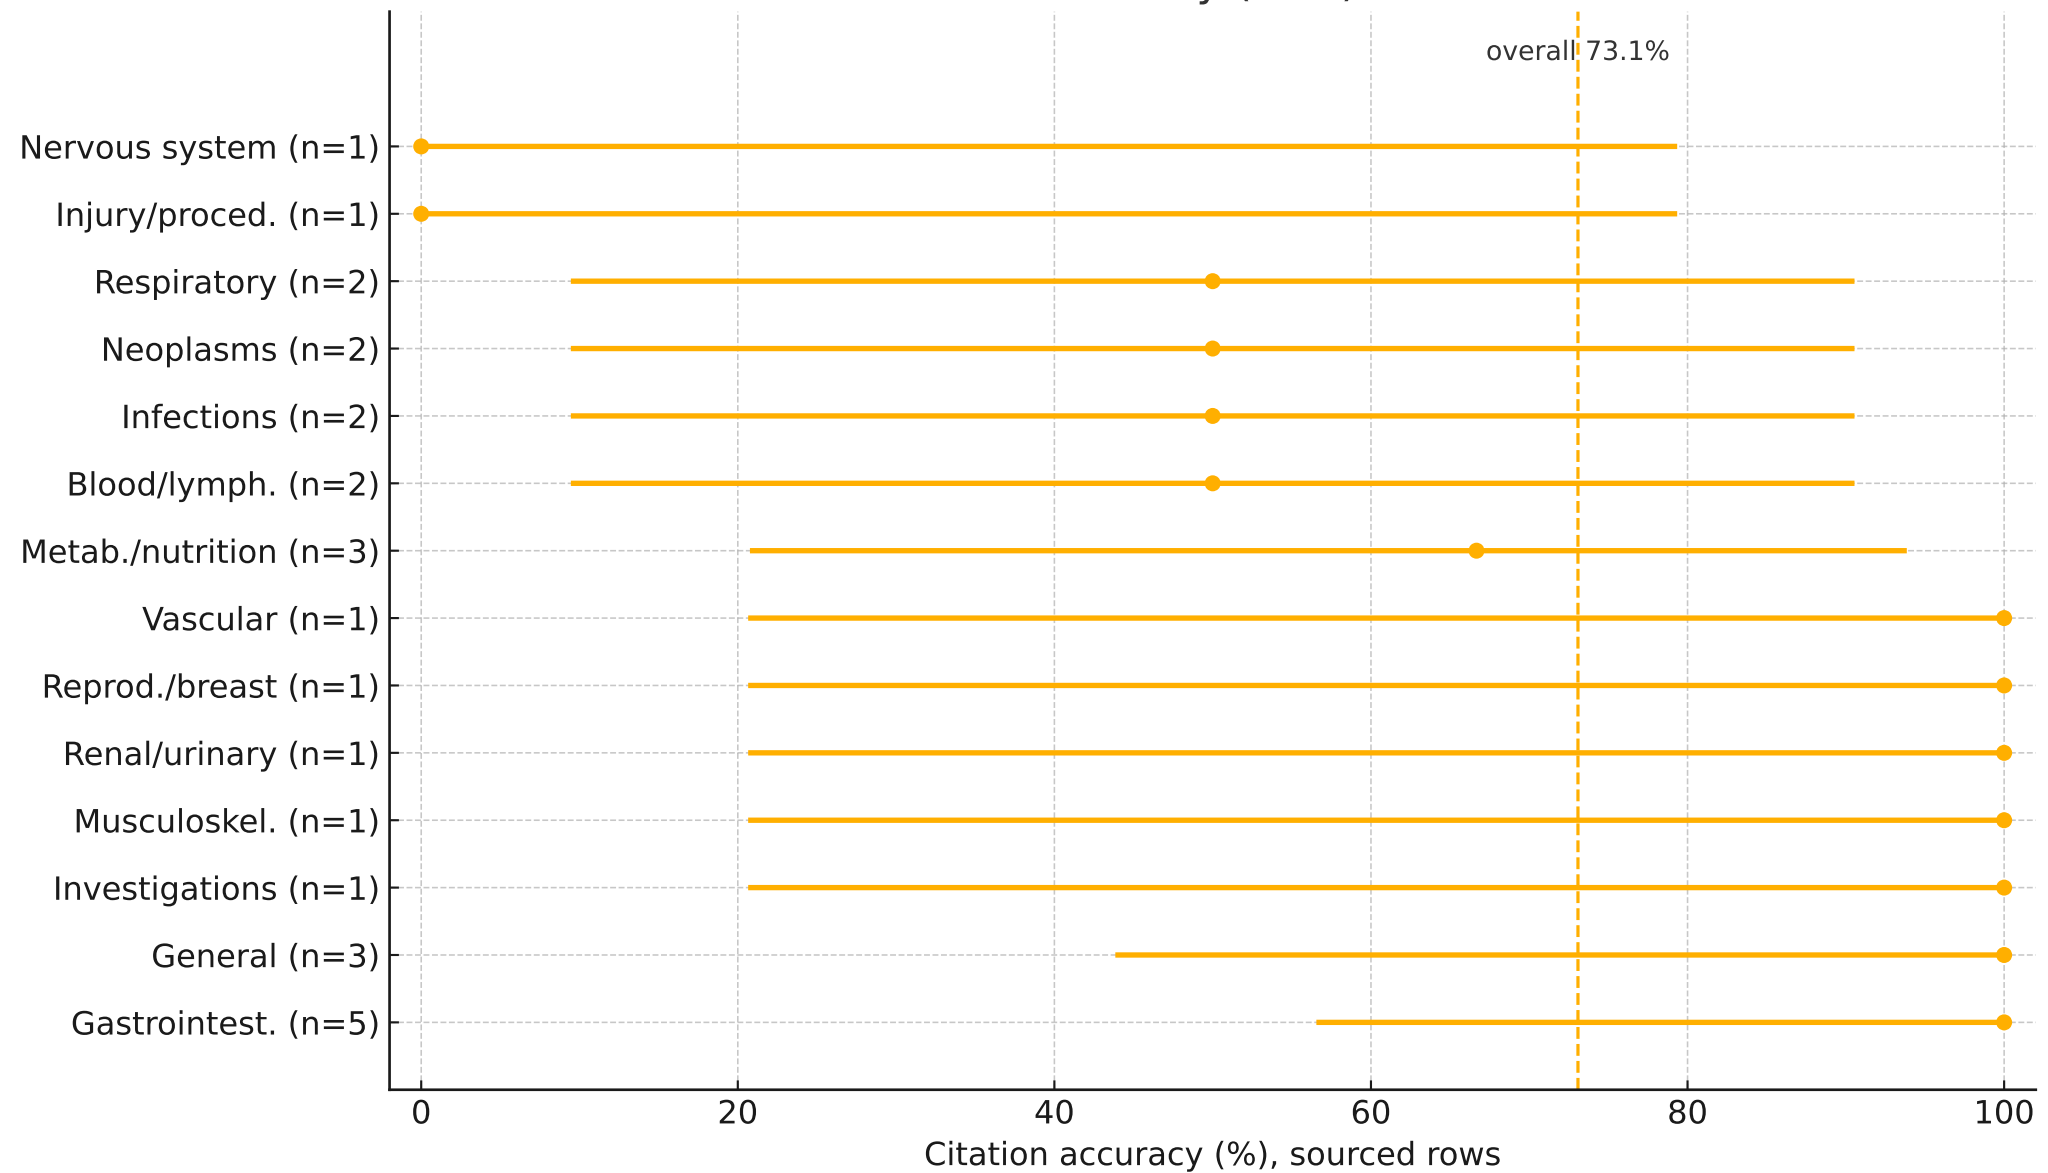

Supplement: supplementary_material [file boxplot_citation_accuracy_per-soc.pdf › boxplot_citation_accuracy_per-soc.pdf]

Per-SOC coverage distribution (§4.8)

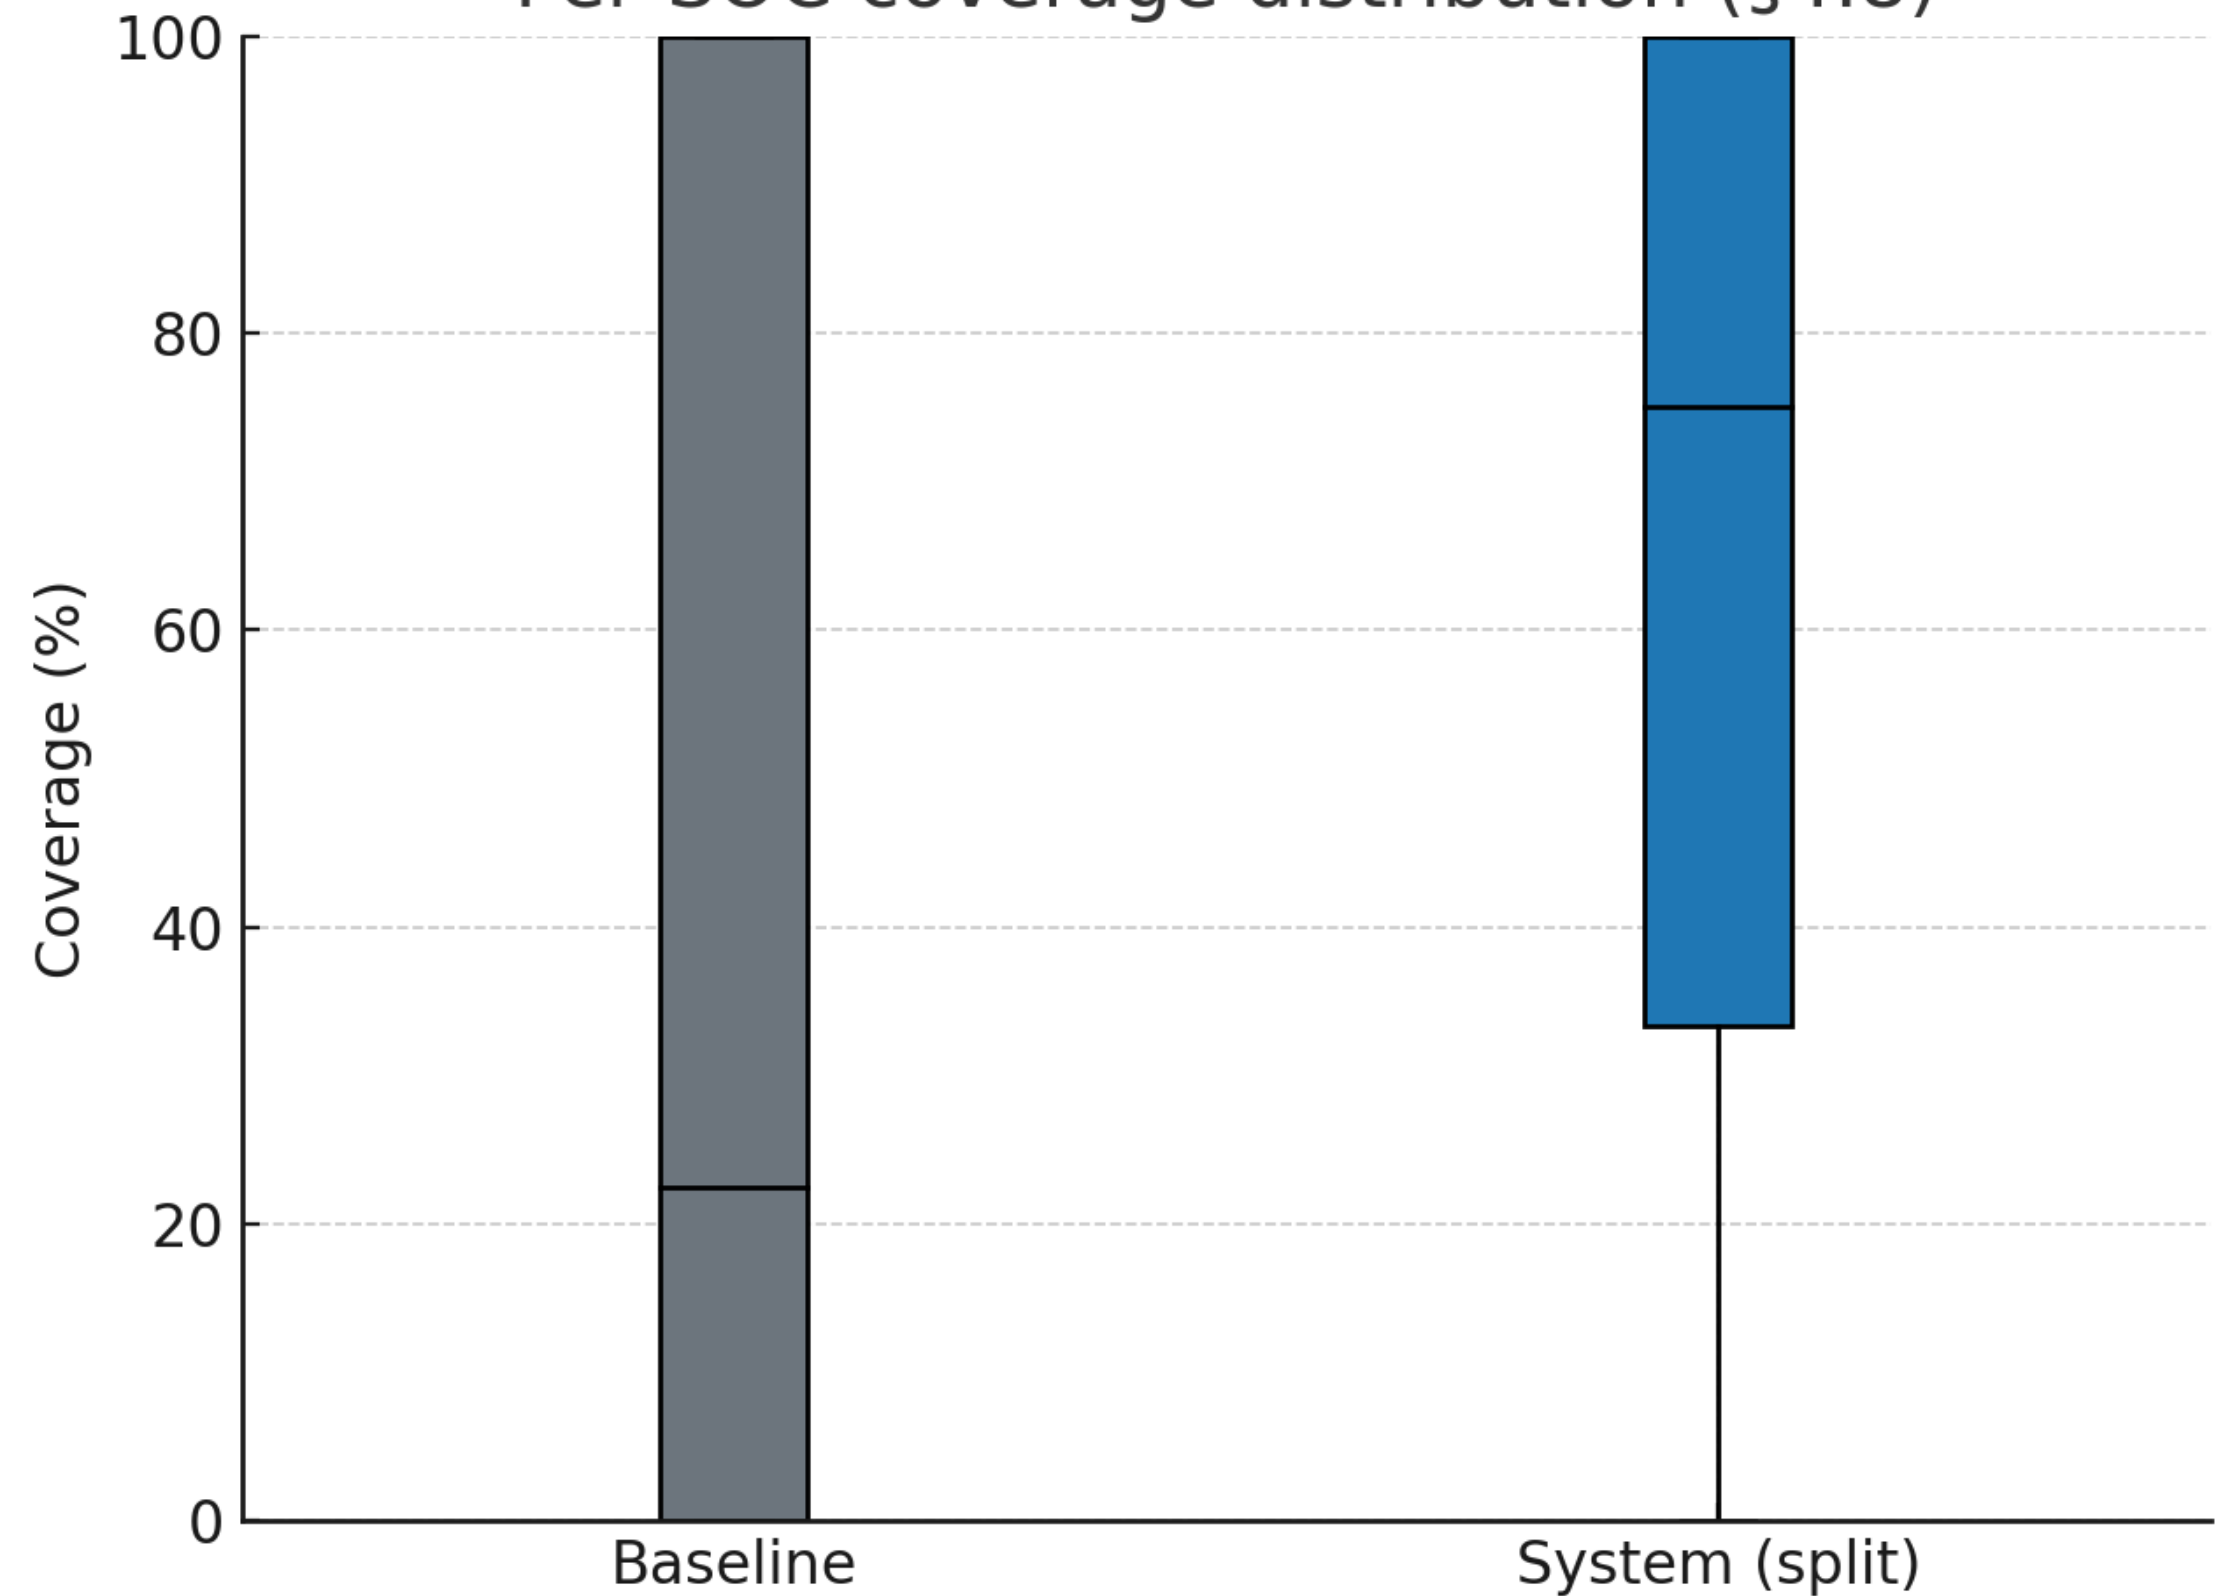

Supplement: supplementary_material [file boxplot_soc-coverage.pdf › boxplot_soc-coverage.pdf]

# Coverage comparison (split-only)

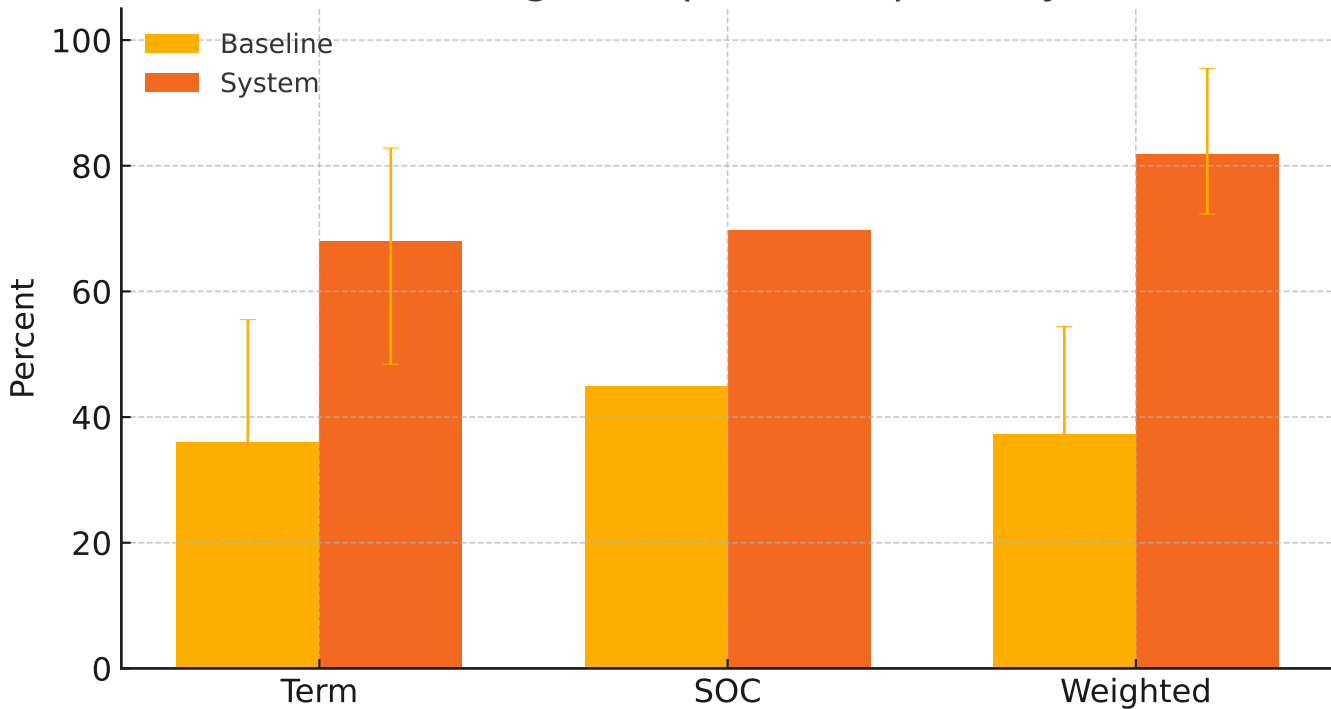

Supplement: supplementary_material [file coverage_comparison_split_vs_baseline.pdf › coverage_comparison_split_vs_baseline.pdf]

Coverage and citation metrics (sirolimus) — with 95% CIs incl. SOC macro

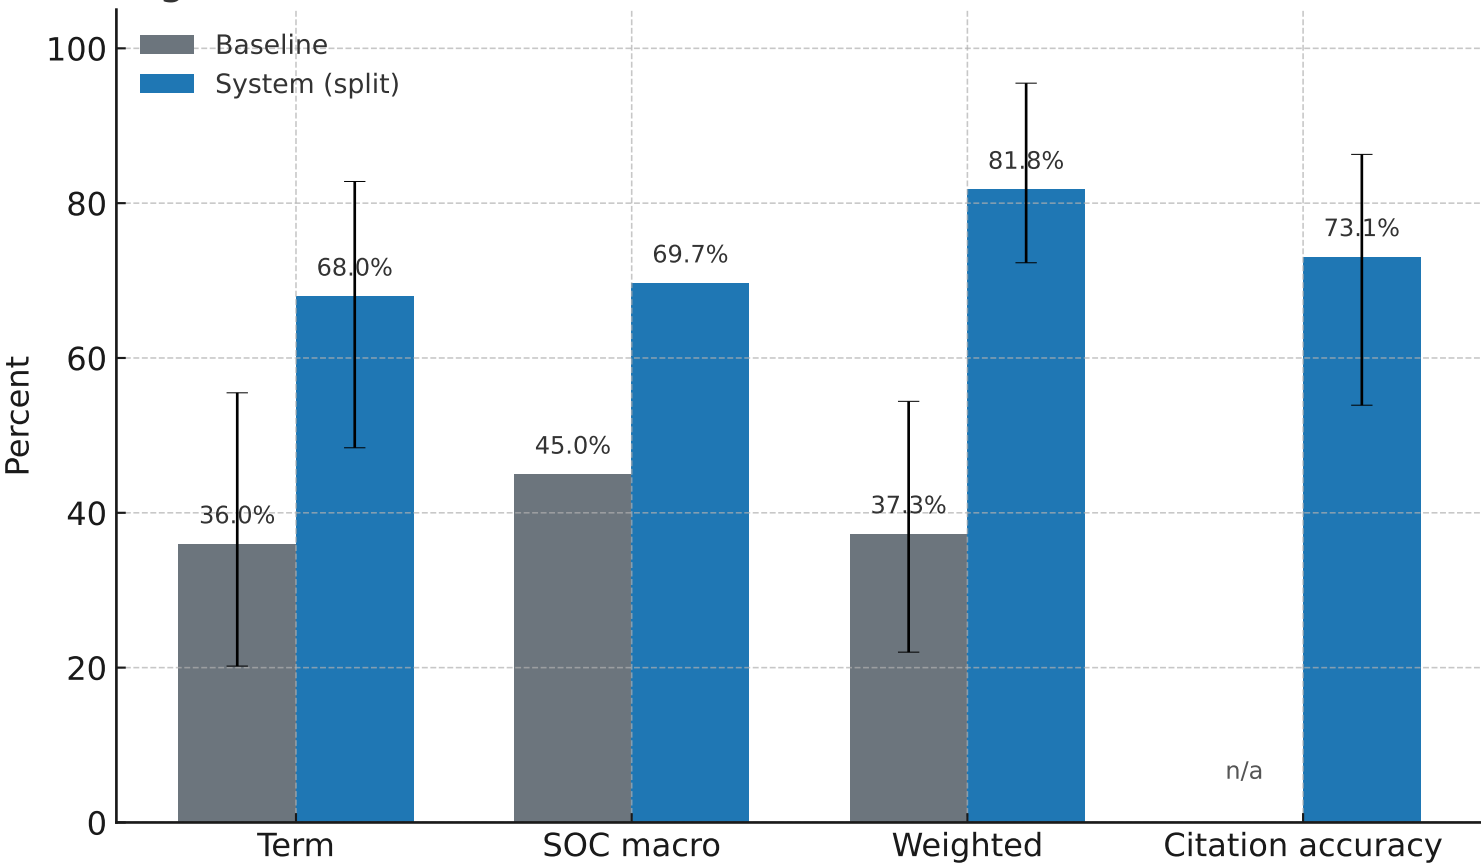

Supplement: supplementary_material [file metrics_summary.pdf › metrics_summary.pdf]

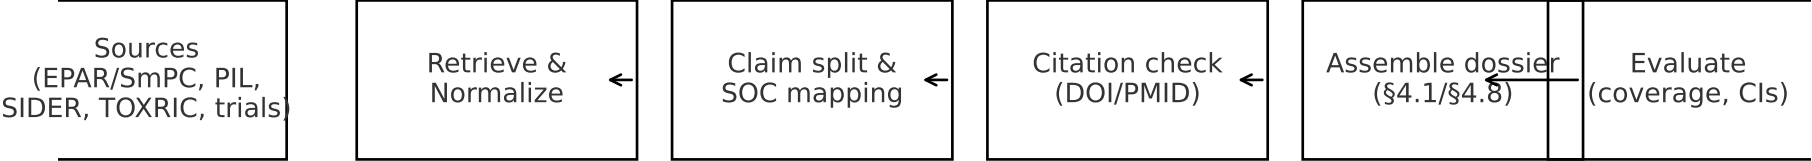

Supplement: supplementary_material [file pipeline_diagram.pdf › pipeline_diagram.pdf]
